# Supplementary material for: Integrated Proteomics and Transcriptomics Analyses Reveal the Transcriptional Slippage of a Bymovirus P3N-PIPO Gene Expressed from a PVX Vector in Nicotiana benthamiana
Source: MDPI journal article supplement (doi:10.3390/v13071247), 2021-06-26
Supplement: s1 [file s1]

**Table S1 Primers used in this study**

| <b>Serial<br/>Number</b> | <b>Name of Primers</b>     | <b>Sequences</b>                                     |
|--------------------------|----------------------------|------------------------------------------------------|
| <b>1</b>                 | GFP-F( <i>AscI/SnaBI</i> ) | 5'-AGGCGCGCCTACGTAGTGAGCAAGGGCGAGGAGC-3'             |
| <b>2</b>                 | GFP-R( <i>Sall</i> )       | 5'-GCGTCGACTTACTTGTACAGCTCGTCCATGCC-3'               |
| <b>3</b>                 | WYMV-P3N-<br>PIPO-F        | 5'-CCATCGATATGGAGCAGACAGCAGCCCAG-3'                  |
| <b>4</b>                 | WYMV-P3N-<br>PIPO-R        | 5'-CTACGTACTACGAAAGATAGGTATAGCGCGAA-3'               |
| <b>5</b>                 | TuMV-P3N-PIPO-<br>F        | 5'-CCATCGATATGGGAACAGAATGGGAGGACAC-3'                |
| <b>6</b>                 | TuMV-P3N-PIPO-<br>R        | 5'-CTACGTACTCCGTTCGTAAGATGACATGACTG-3'               |
| <b>7</b>                 | WYMV-P3N-<br>PIPO-FS-1-F   | 5'-<br>CTCCCTCTTAATCAGCGGAAAAAATCGCGTAGAAAGT-<br>3'  |
| <b>8</b>                 | WYMV-P3N-<br>PIPO-FS-1-R   | 5'-<br>ACTTTCTACGCGATTTTTTTCCGCTGATTAAGAGGGAG-<br>3' |
| <b>9</b>                 | WYMV-P3N-<br>PIPO-M1-F     | 5'-<br>CTCCCTCTTAATCAGCGGACGCAATCGCGTAGAAAGT-3'      |
| <b>10</b>                | WYMV-P3N-<br>PIPO-M1-R     | 5'-<br>ACTTTCTACGCGATTGCGTCCGCTGATTAAGAGGGAG-3'      |
| <b>11</b>                | WYMV-P3N-<br>PIPO-M2-F     | 5'-<br>CTCCCTCTTAATCAGCCTAAAAAATCGCGTAGAAAGT-3'      |
| <b>12</b>                | WYMV-P3N-<br>PIPO-M2-R     | 5'-ACTTTCTACGCGATTTTTTAGGCTGATTAAGAGGGAG-<br>3'      |
